**Fig. S1.** Different developmental stages of the tubeworm *Hydroides elegans*. (A) Adult stage; (B) the competent larval stage, when they are physiologically equipped to search for a hard surface to attach and metamorphose into juveniles; (C) completely attached and metamorphosed larval stage; and (D) newly metamorphosed larvae or juvenile with calcareous ( $\text{CaCO}_3$ ) tube.

**Fig. S2.** The pH (NBS scale) (A) and dissolved oxygen ( $\text{mg O}_2 \text{ l}^{-1}$ ) levels (B) measured from 0 to 160 h post-fertilization in the control (CON), ocean acidification (OA), hypoxia (HYP) and the combined OA×HYP groups. Each data point represents the mean  $\pm$  s.d. of three replicates.

**Fig. S3.** 2-DE reproducibility analysis: 2-DE gels of total protein (A) and phosphoprotein (B) stained images of the tubeworm larvae obtained from the three biologically independent experiments of the ocean acidification (OA) treatment. R1–R3, replicate experiments.

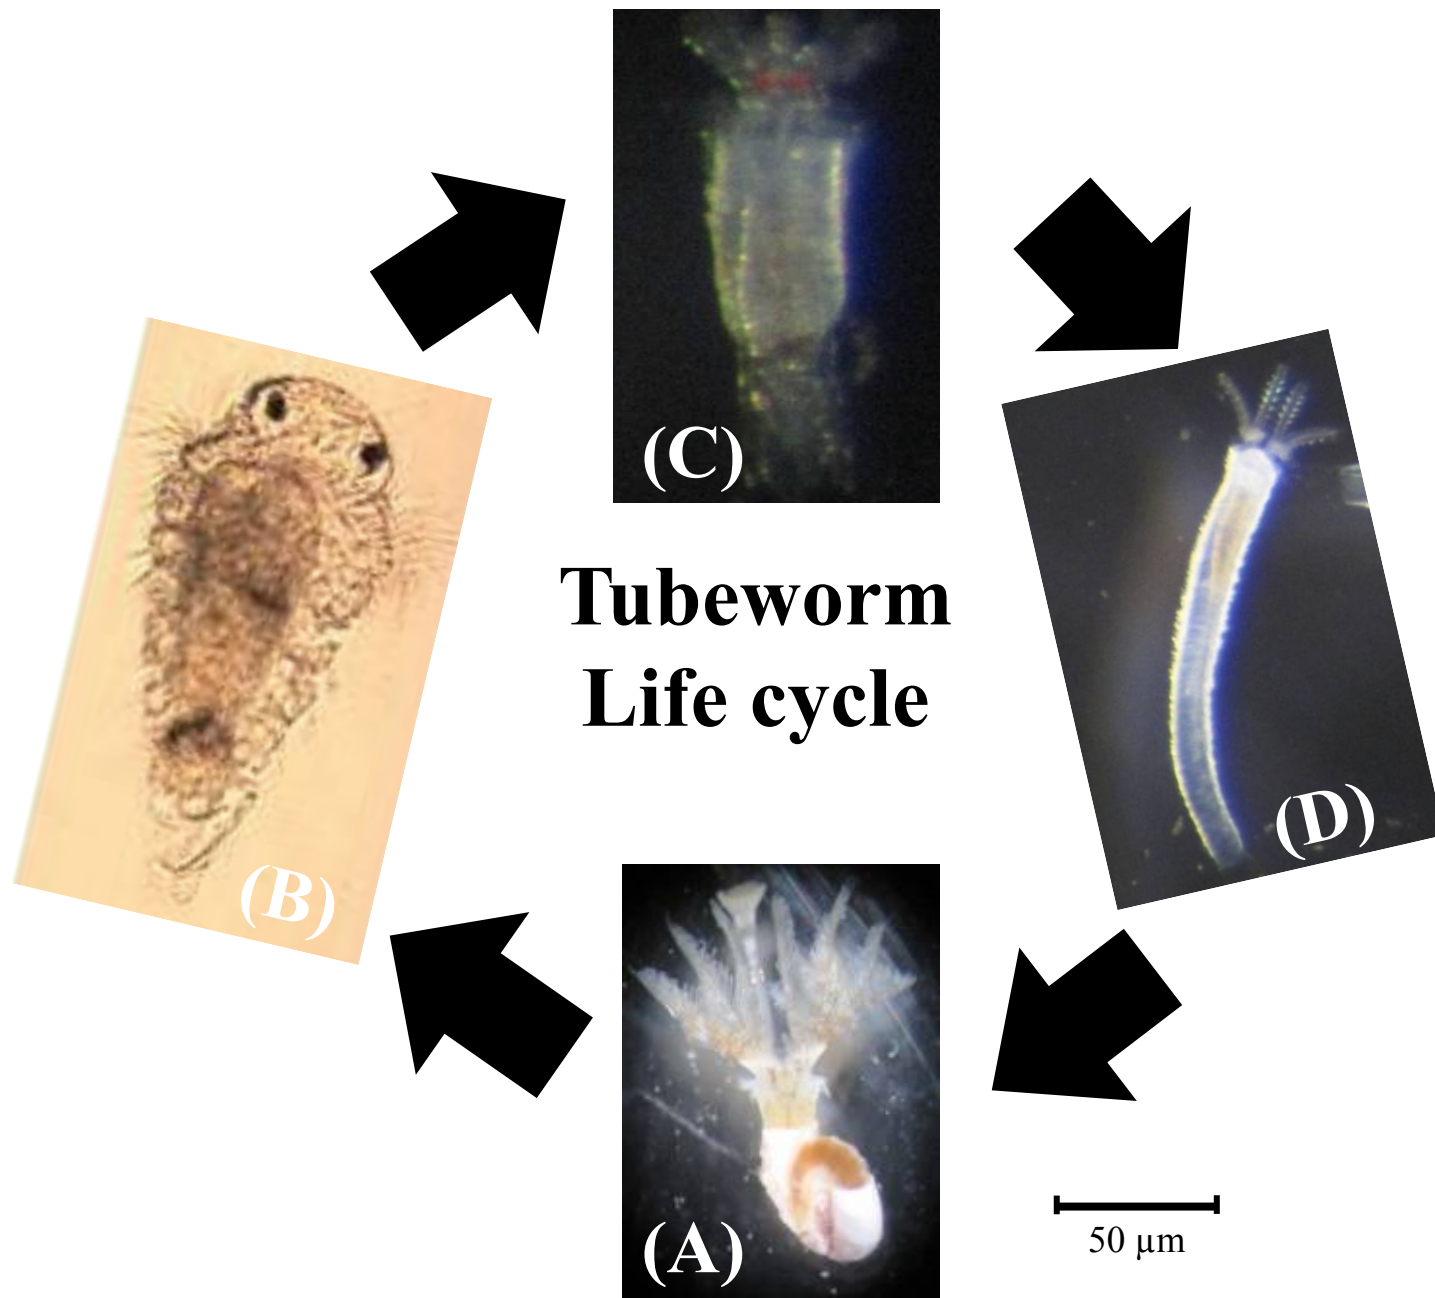

**Figure S1**

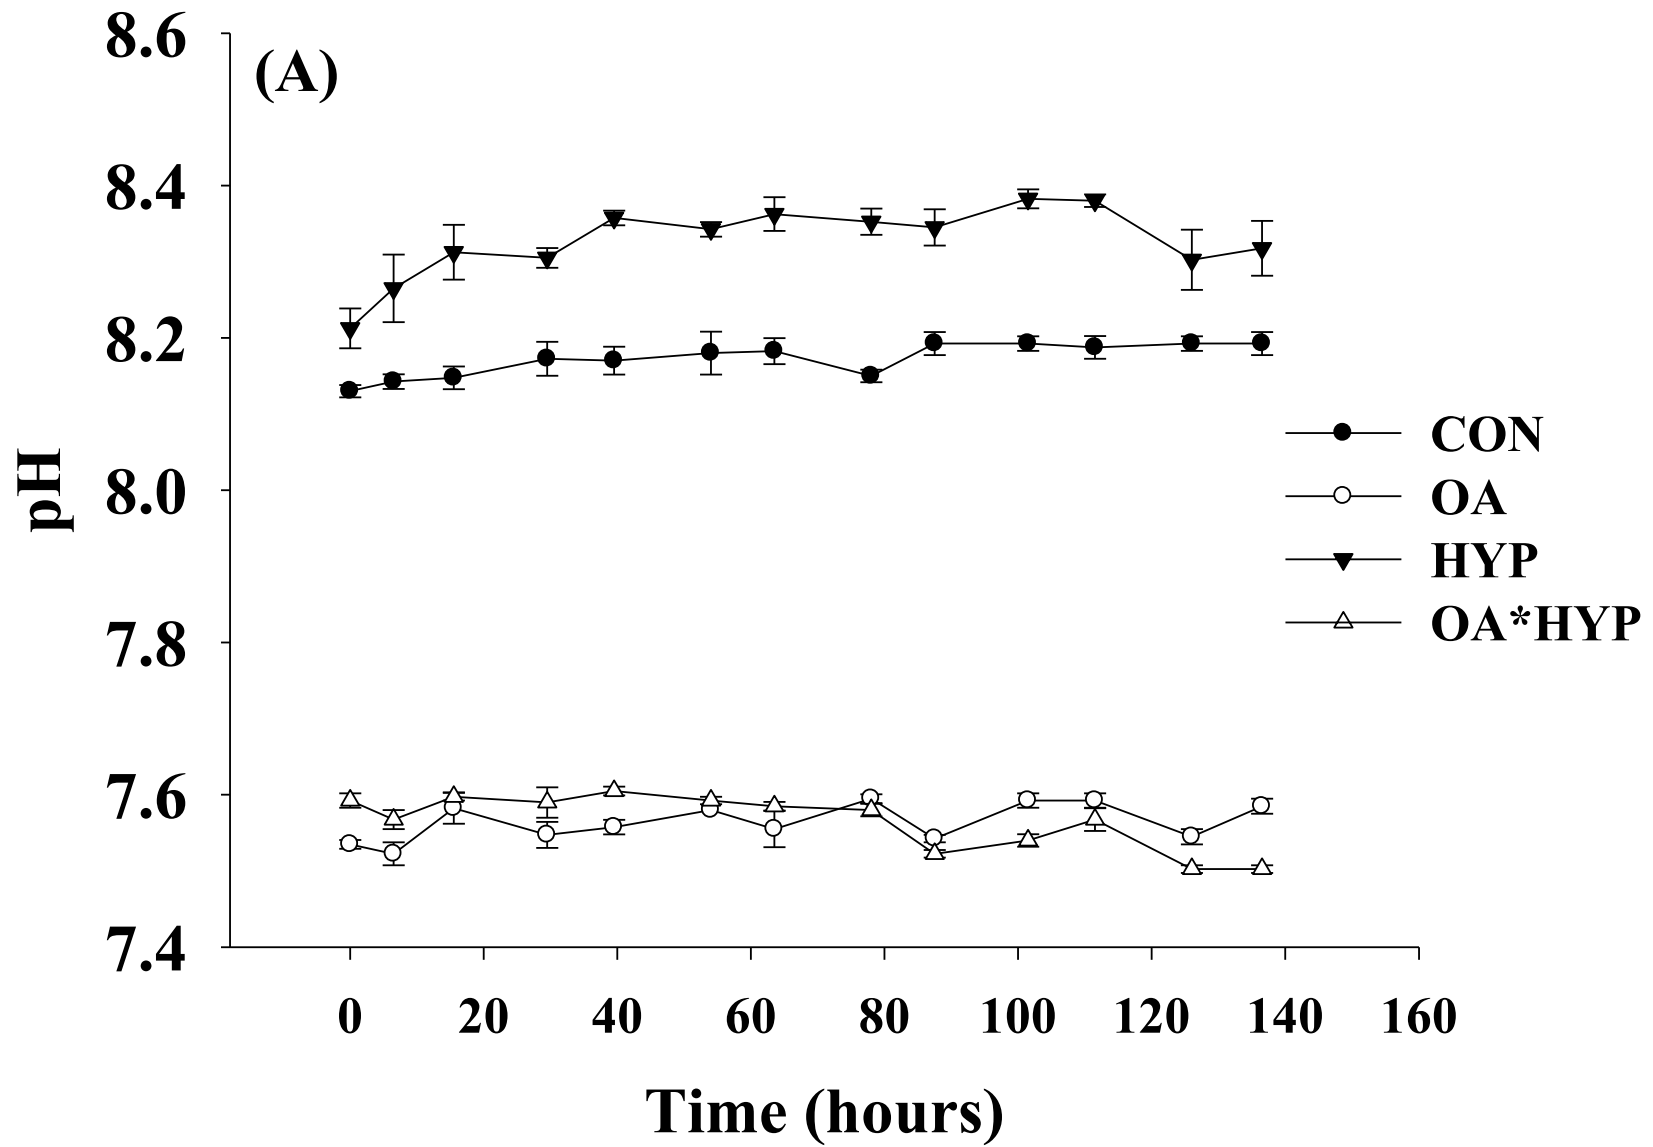

Figure S2A

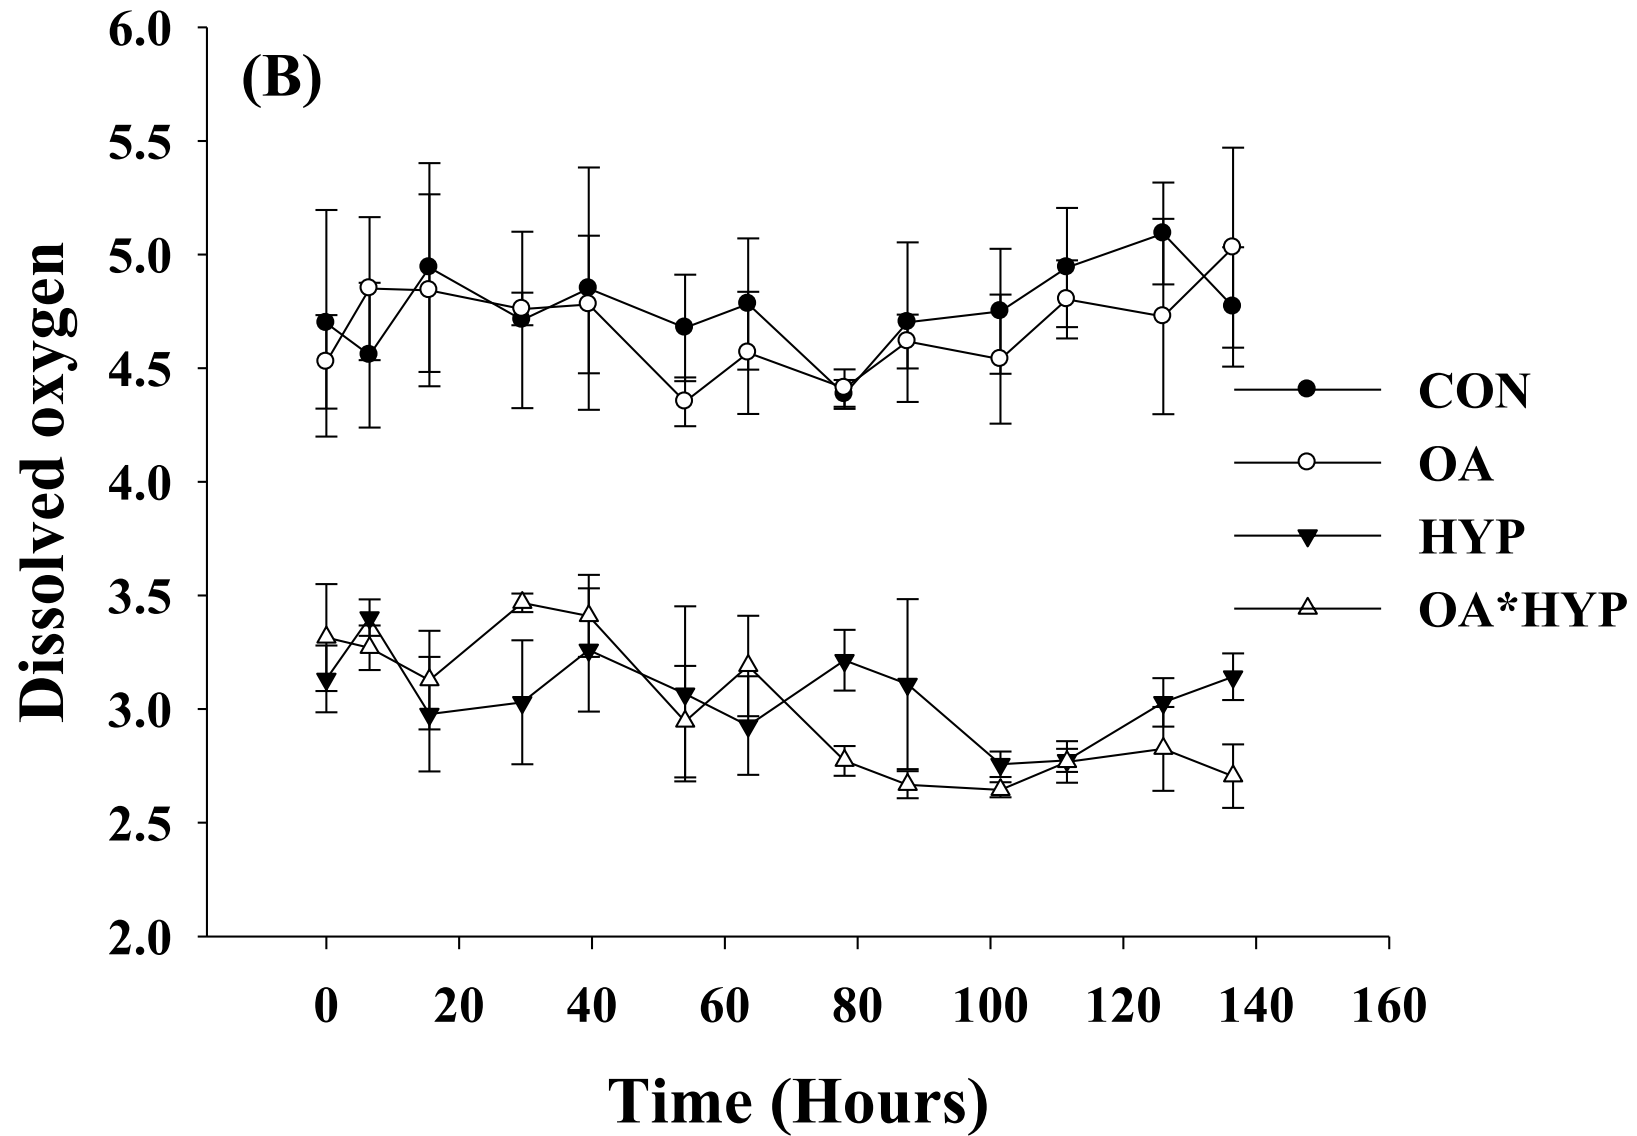

**Figure S2B**

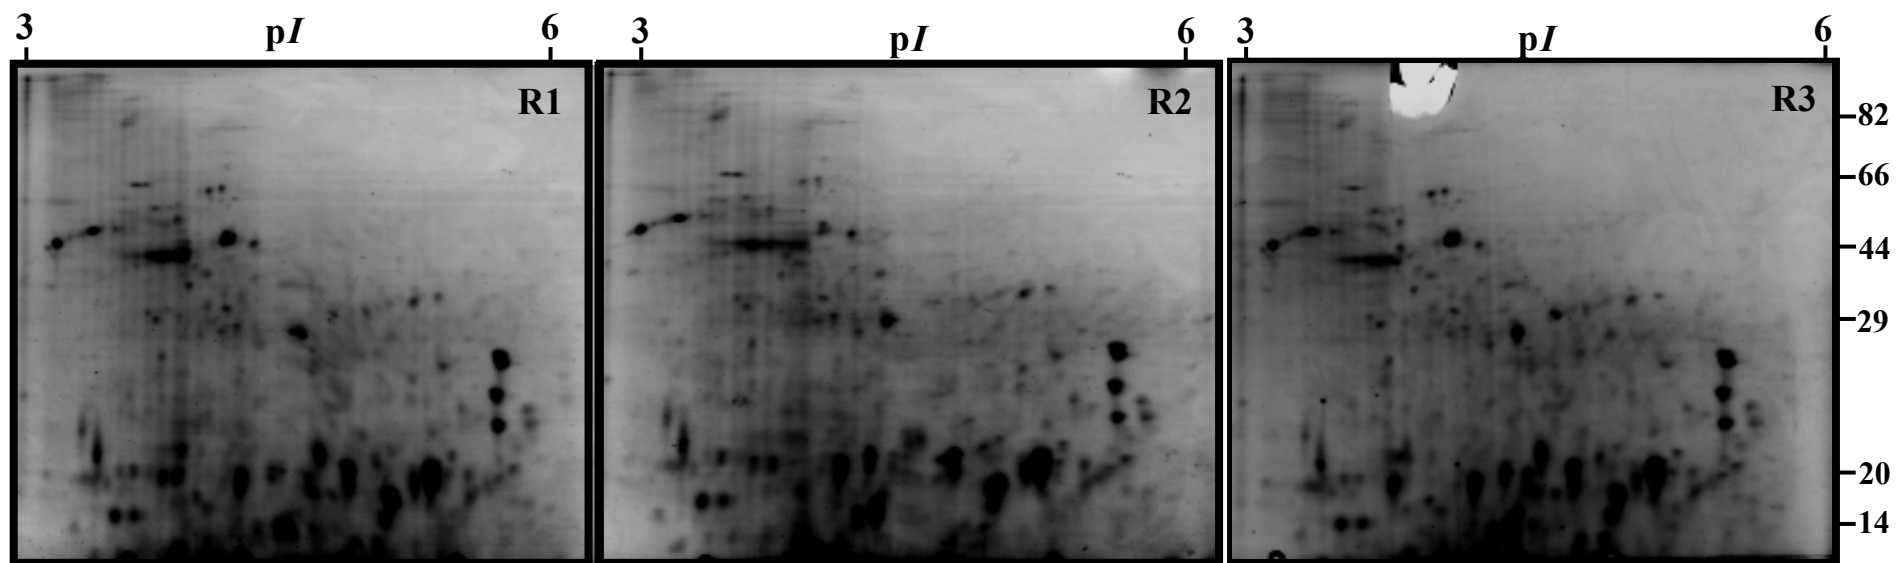

**Figure S3A**

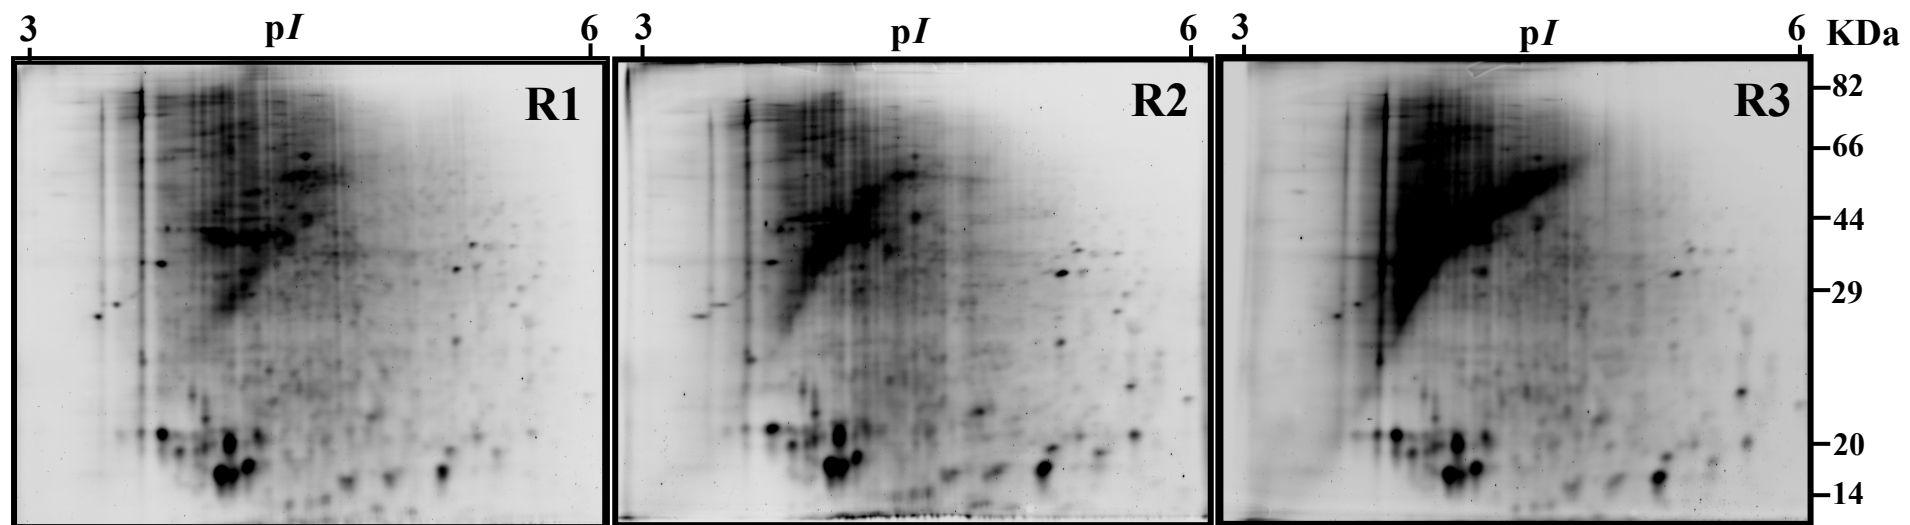

**Figure S3B**

Table S1. Summary of measured and calculated carbonate system parameters for the four treatment conditions (CON: control, OA: ocean acidification, HYP: hypoxia) in larval culture tanks during larval growth and metamorphosis. The larval samples for proteomics analysis were collected after metamorphosis. Measured values are shown as means  $\pm$  S.D. of three replicate tanks. TA: total alkalinity;  $p\text{CO}_2$ : partial pressure of carbon dioxide ( $\text{CO}_2$ );  $\Omega_{\text{Cal}}$ : saturation state of calcite;  $\Omega_{\text{Ag}}$ : saturation state of aragonite

|                      | Treatments      | Measured                   |                              |                         |                              | Calculated                         |                                                |                       |                      |
|----------------------|-----------------|----------------------------|------------------------------|-------------------------|------------------------------|------------------------------------|------------------------------------------------|-----------------------|----------------------|
|                      |                 | $\text{pH}_{(\text{NBS})}$ | Temp. ( $^{\circ}\text{C}$ ) | Salinity ( $\text{‰}$ ) | TA ( $\text{mmol kg}^{-1}$ ) | $p\text{CO}_2$ ( $\mu\text{atm}$ ) | $\text{CO}_3^{2-}$ ( $\mu\text{mol kg}^{-1}$ ) | $\Omega_{\text{Cal}}$ | $\Omega_{\text{Ag}}$ |
| Larval growth        | CON             | 8.14 $\pm$ 0.01            | 24.3 $\pm$ 0.5               | 34                      | 2.53 $\pm$ 0.03              | 333                                | 269                                            | 6.52                  | 4.28                 |
|                      | OA              | 7.43 $\pm$ 0.02            | 24.6 $\pm$ 0.1               | 34                      | 2.53 $\pm$ 0.02              | 2181                               | 66                                             | 1.61                  | 1.06                 |
|                      | HYP             | 8.33 $\pm$ 0.01            | 24.4 $\pm$ 0.3               | 34                      | 2.51 $\pm$ 0.03              | 186                                | 364                                            | 8.82                  | 5.79                 |
|                      | OA $\times$ HYP | 7.38 $\pm$ 0.04            | 24.8 $\pm$ 0.5               | 34                      | 2.52 $\pm$ 0.03              | 2448                               | 60                                             | 1.45                  | 0.95                 |
| Larval metamorphosis | CON             | 8.13 $\pm$ 0.01            | 22.8 $\pm$ 0.3               | 34                      | 2.52 $\pm$ 0.02              | 344                                | 253                                            | 6.10                  | 3.99                 |
|                      | OA              | 7.47 $\pm$ 0.06            | 22.6 $\pm$ 0.5               | 34                      | 2.53 $\pm$ 0.01              | 1965                               | 69                                             | 1.67                  | 1.09                 |
|                      | HYP             | 8.22 $\pm$ 0.03            | 23 $\pm$ 0.4                 | 34                      | 2.51 $\pm$ 0.01              | 265                                | 296                                            | 7.14                  | 4.67                 |
|                      | OA $\times$ HYP | 7.69 $\pm$ 0.01            | 23 $\pm$ 0.4                 | 35                      | 2.52 $\pm$ 0.03              | 2515                               | 111                                            | 2.67                  | 1.75                 |
